# Supplementary material for: On preparing highly abrasion resistant binderless and in situ N-doped granular activated carbon
Source: Royal Society of Chemistry journal article supplement (doi:10.1039/c8ra03243b), 2018-01-01
Supplement: c8ra03243b1.pdf [file c8ra03243b1.pdf]

### Electronic supplementary information (ESI)

#### On preparing high abrasive resistance binderless and in situ N-doped granular activated carbon with NaOH/urea solution system

Zhenghan Cai<sup>a</sup>, Xuan Yang<sup>a</sup>, Guanfeng Lin<sup>b</sup>, Cuixia Chen<sup>a</sup>, Yandan Chen<sup>a\*</sup>, Biao Huang<sup>a,\*</sup>

(a. Materials Engineering College, Fujian Agriculture and Forestry University, Fuzhou 350002; b. Jinshan College, Fujian Agriculture and Forestry University, Fuzhou 350002)

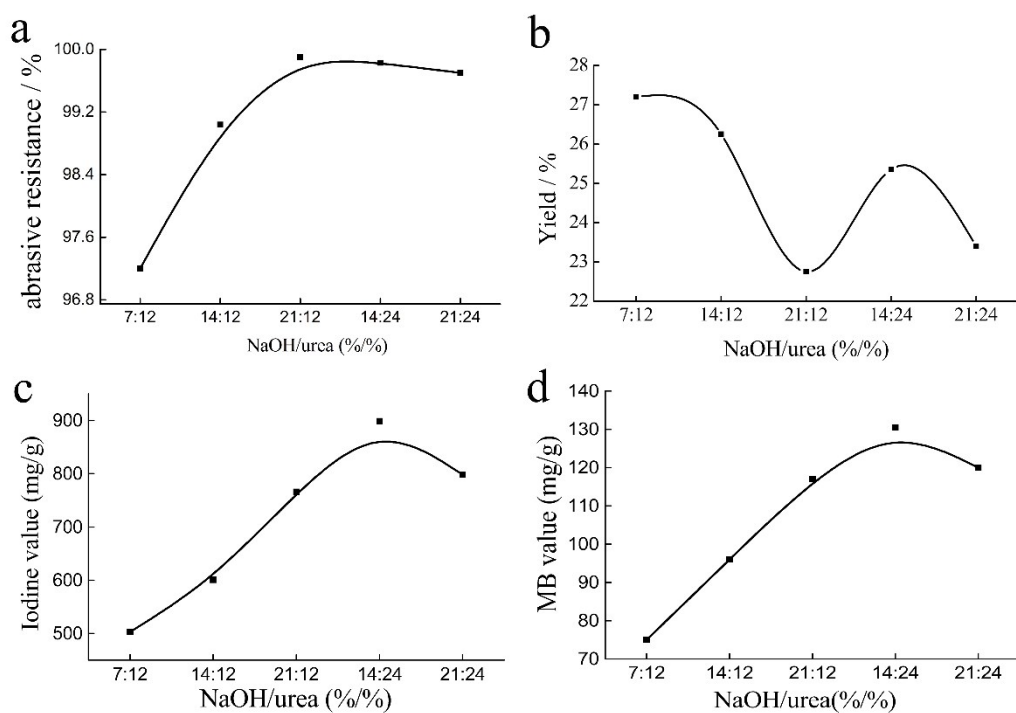

Fig. S1 Effects of NaOH/urea mass concentration ratio on abrasive resistance (a), yield (b) and adsorption performance (c, d) of NaOH/urea-GACs

\* Corresponding author. Tel.: +86 591 83715175; fax: +86 591 83715175. E-mail address: fjaucyd@163.com (Yandan Chen)

\* Corresponding author. Tel.: +86 591 88160598; fax: +86 591 85715175. E-mail address: bhuang@fafu.edu.cn (B. Huang)

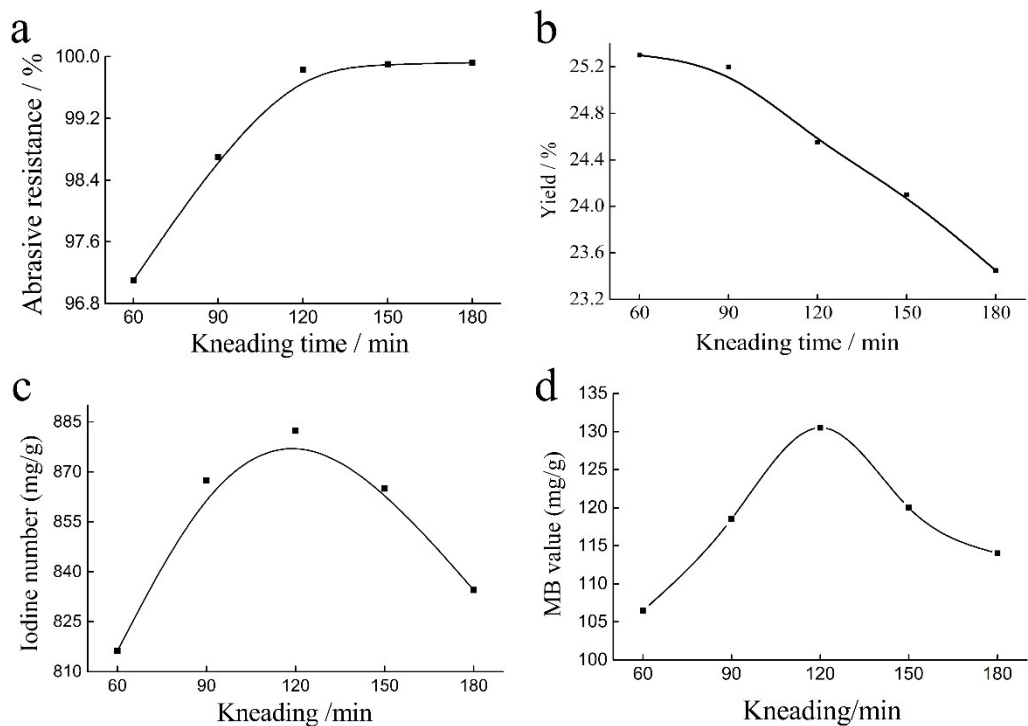

Fig. S2 Effects of kneading time on abrasive resistance (a), yield (b) and adsorption performance (b, d) of NaOH/urea-GACs

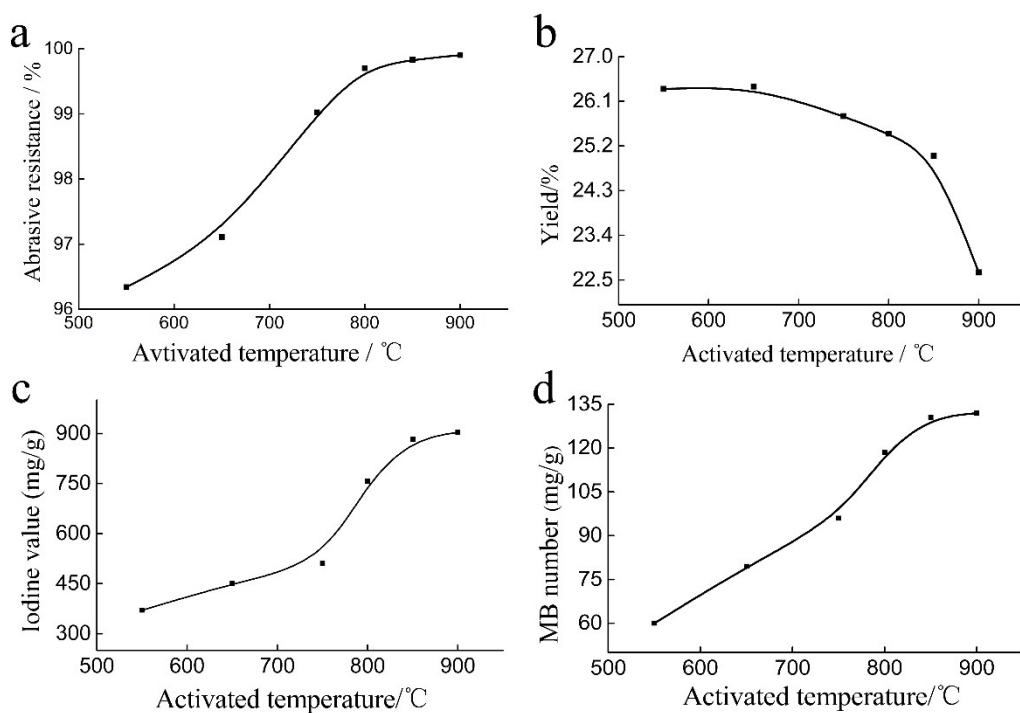

Fig. S3 Effects of activated time on abrasive resistance (a), yield (b) and adsorption performance (b, d) of NaOH/urea-GACs

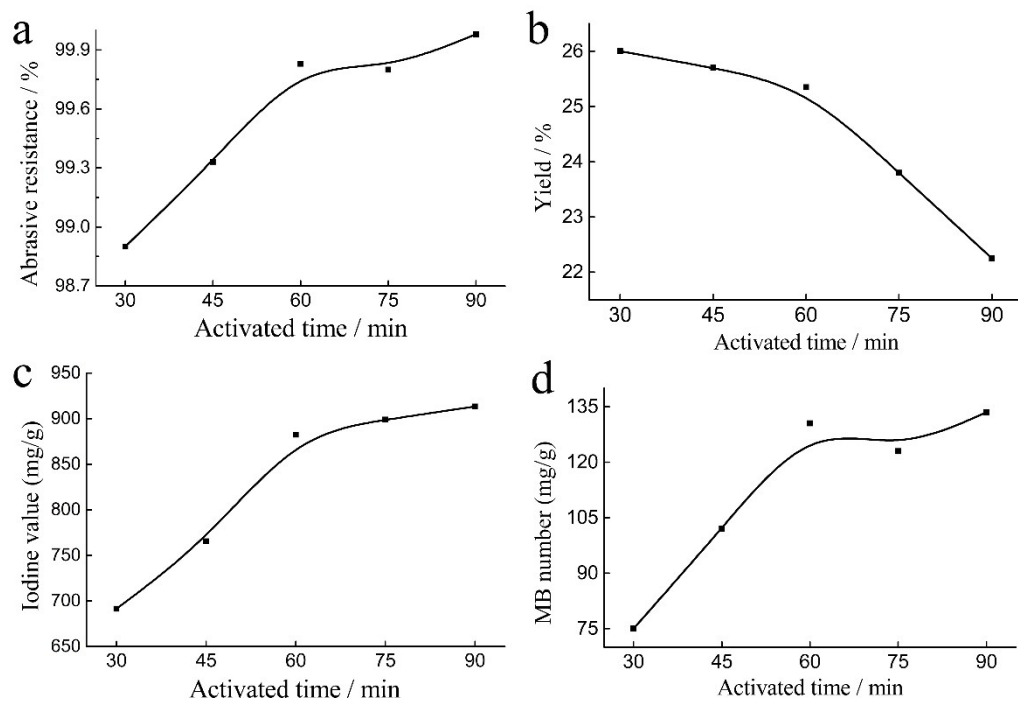

Fig. S4 Effects of activated temperature on abrasive resistance (a), yield (b) and adsorption performance (b, d) of NaOH/urea-GACs

Table S1 The factors and levels of RSA

| factors                  | coding         | levels         |                |                |
|--------------------------|----------------|----------------|----------------|----------------|
|                          |                | -1             | 0              | 1              |
| Mass Concentration Ratio | X <sub>1</sub> | 1 <sup>a</sup> | 2 <sup>a</sup> | 3 <sup>a</sup> |
| Activated Temperature/°C | X <sub>2</sub> | 800            | 850            | 900            |
| Activated Time/min       | X <sub>3</sub> | 50             | 70             | 90             |

a: 1, 2, 3 represent the alkali urea mass ratio of 14 : 12, 14 : 24 and 21: 24, respectively.

Table S2 The experimental designs and results of RSA

| serial number | independent variable |                |                | Response value iodine value (mg·g <sup>-1</sup> ) |                 |
|---------------|----------------------|----------------|----------------|---------------------------------------------------|-----------------|
|               | X <sub>1</sub>       | X <sub>2</sub> | X <sub>3</sub> | trial value                                       | predicted value |
| 1             | 1                    | 0              | 1              | 887.03                                            | 886.10          |
| 2             | -1                   | 0              | -1             | 789.75                                            | 790.68          |
| 3             | 1                    | -1             | 0              | 807.72                                            | 807.65          |
| 4             | 0                    | 0              | 0              | 882.31                                            | 882.48          |
| 5             | 1                    | 0              | -1             | 812.41                                            | 812.76          |
| 6             | 0                    | 1              | -1             | 837.44                                            | 836.43          |
| 7             | -1                   | 0              | 1              | 827.85                                            | 827.50          |
| 8             | 1                    | 1              | 0              | 868.33                                            | 868.99          |
| 9             | -1                   | 1              | 0              | 838.68                                            | 838.71          |
| 10            | 0                    | 0              | 0              | 883.27                                            | 882.48          |
| 11            | -1                   | -1             | 0              | 757.91                                            | 757.25          |
| 12            | 0                    | 1              | 1              | 913.09                                            | 913.36          |
| 13            | 0                    | -1             | -1             | 787.16                                            | 786.89          |
| 14            | 0                    | -1             | 1              | 819.11                                            | 820.12          |
| 15            | 0                    | 0              | 0              | 881.98                                            | 882.48          |
| 16            | 0                    | 0              | 0              | 882.10                                            | 882.48          |
| 17            | 0                    | 0              | 0              | 882.76                                            | 882.48          |

Table S3 ANOVA for Response Surface Quadratic of Iodine value

| Source                        | SS <sup>a</sup> | Df <sup>b</sup> | MS <sup>c</sup> | F-Value  | P-Value |
|-------------------------------|-----------------|-----------------|-----------------|----------|---------|
| Model                         | 31461.80        | 9               | 3495.76         | 3976.16  | <0.0001 |
| X <sub>1</sub>                | 3254.23         | 1               | 3254.23         | 3701.44  | <0.0001 |
| X <sub>2</sub>                | 10195.21        | 1               | 10195.21        | 11596.30 | <0.0001 |
| X <sub>3</sub>                | 6067.61         | 1               | 6067.61         | 6901.46  | <0.0001 |
| X <sub>1</sub> X <sub>2</sub> | 101.10          | 1               | 101.10          | 115.00   | <0.0001 |
| X <sub>1</sub> X <sub>3</sub> | 333.43          | 1               | 333.43          | 379.25   | <0.0001 |
| X <sub>2</sub> X <sub>3</sub> | 477.42          | 1               | 477.42          | 543.03   | <0.0001 |
| X <sub>1</sub> <sup>2</sup>   | 5807.37         | 1               | 5807.37         | 6605.45  | <0.0001 |
| X <sub>2</sub> <sup>2</sup>   | 3114.71         | 1               | 3114.71         | 3542.76  | <0.0001 |
| X <sub>3</sub> <sup>2</sup>   | 1089.48         | 1               | 1089.48         | 1239.20  | <0.0001 |
| Residual                      | 6.15            | 7               | 0.88            |          |         |
| Lack of fit                   | 5.03            | 3               | 1.68            | 5.96     | 0.0588  |
| Pure error                    | 1.13            | 4               | 0.28            |          |         |
| Cor total                     | 31467.96        | 16              |                 |          |         |

a: Sum of square; b: Degree of freedom; c: Mean square.

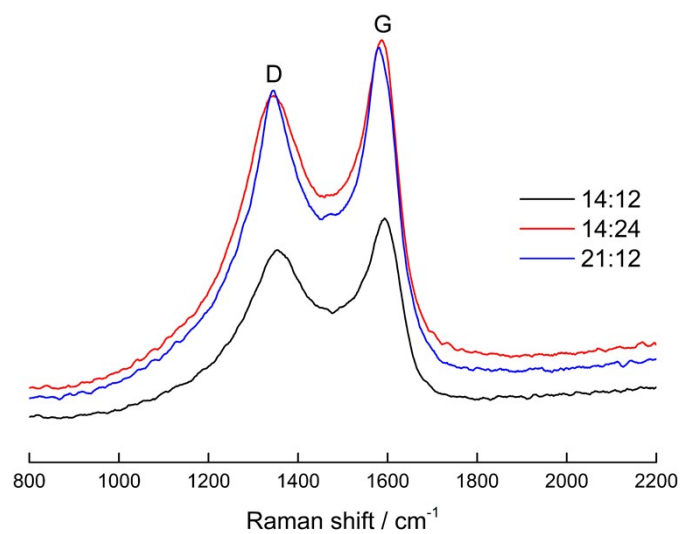

Fig. S5 Raman spectra of ordinary-GACs and NaOHurea GACs different ratio

Table S4 The analysis of R2 for regression equation of Iodine value

| Standard deviation | Average value | Coefficient of variation/% | R <sup>2</sup> | Adjusted R <sup>2</sup> | Predicted R <sup>2</sup> | Adequate precision |
|--------------------|---------------|----------------------------|----------------|-------------------------|--------------------------|--------------------|
| 0.94               | 844.64        | 0.11                       | 0.9998         | 0.9996                  | 0.9974                   | 217.080            |
